# Supplementary material for: Differential regulation of Cav2.2 channel exon 37 variants by alternatively spliced μ-opioid receptors
Source: PubMed Central journal article supplement (PMC6880636; doi:10.1186/s13041-019-0524-6), 2019-11-27

**a****Cav2.2-37a+mMOR1**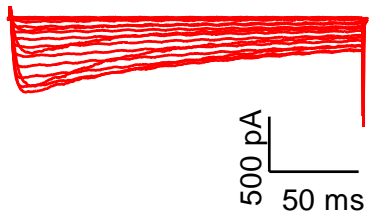**Cav2.2-37a+mMOR10**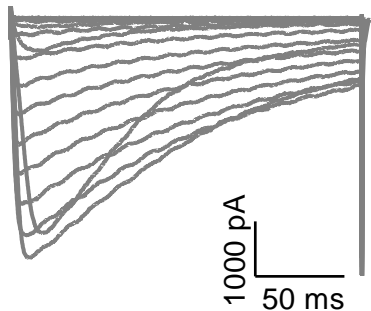**b**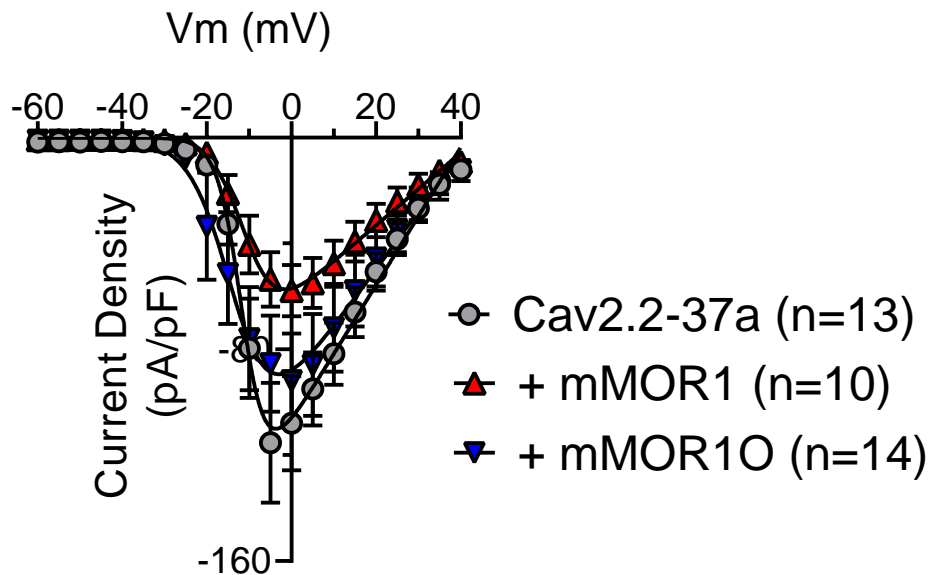

Supplement: 13041_2019_524_MOESM1_ESM.pdf [file 13041_2019_524_MOESM1_ESM.pdf]
